# Supplementary material for: Genomic Analysis of the Emergence and Rapid Global Dissemination of the Clonal Group 258 Klebsiella pneumoniae Pandemic
Source: PubMed Central journal article supplement (PMC4510304; doi:10.1371/journal.pone.0133727), 2015-07-21

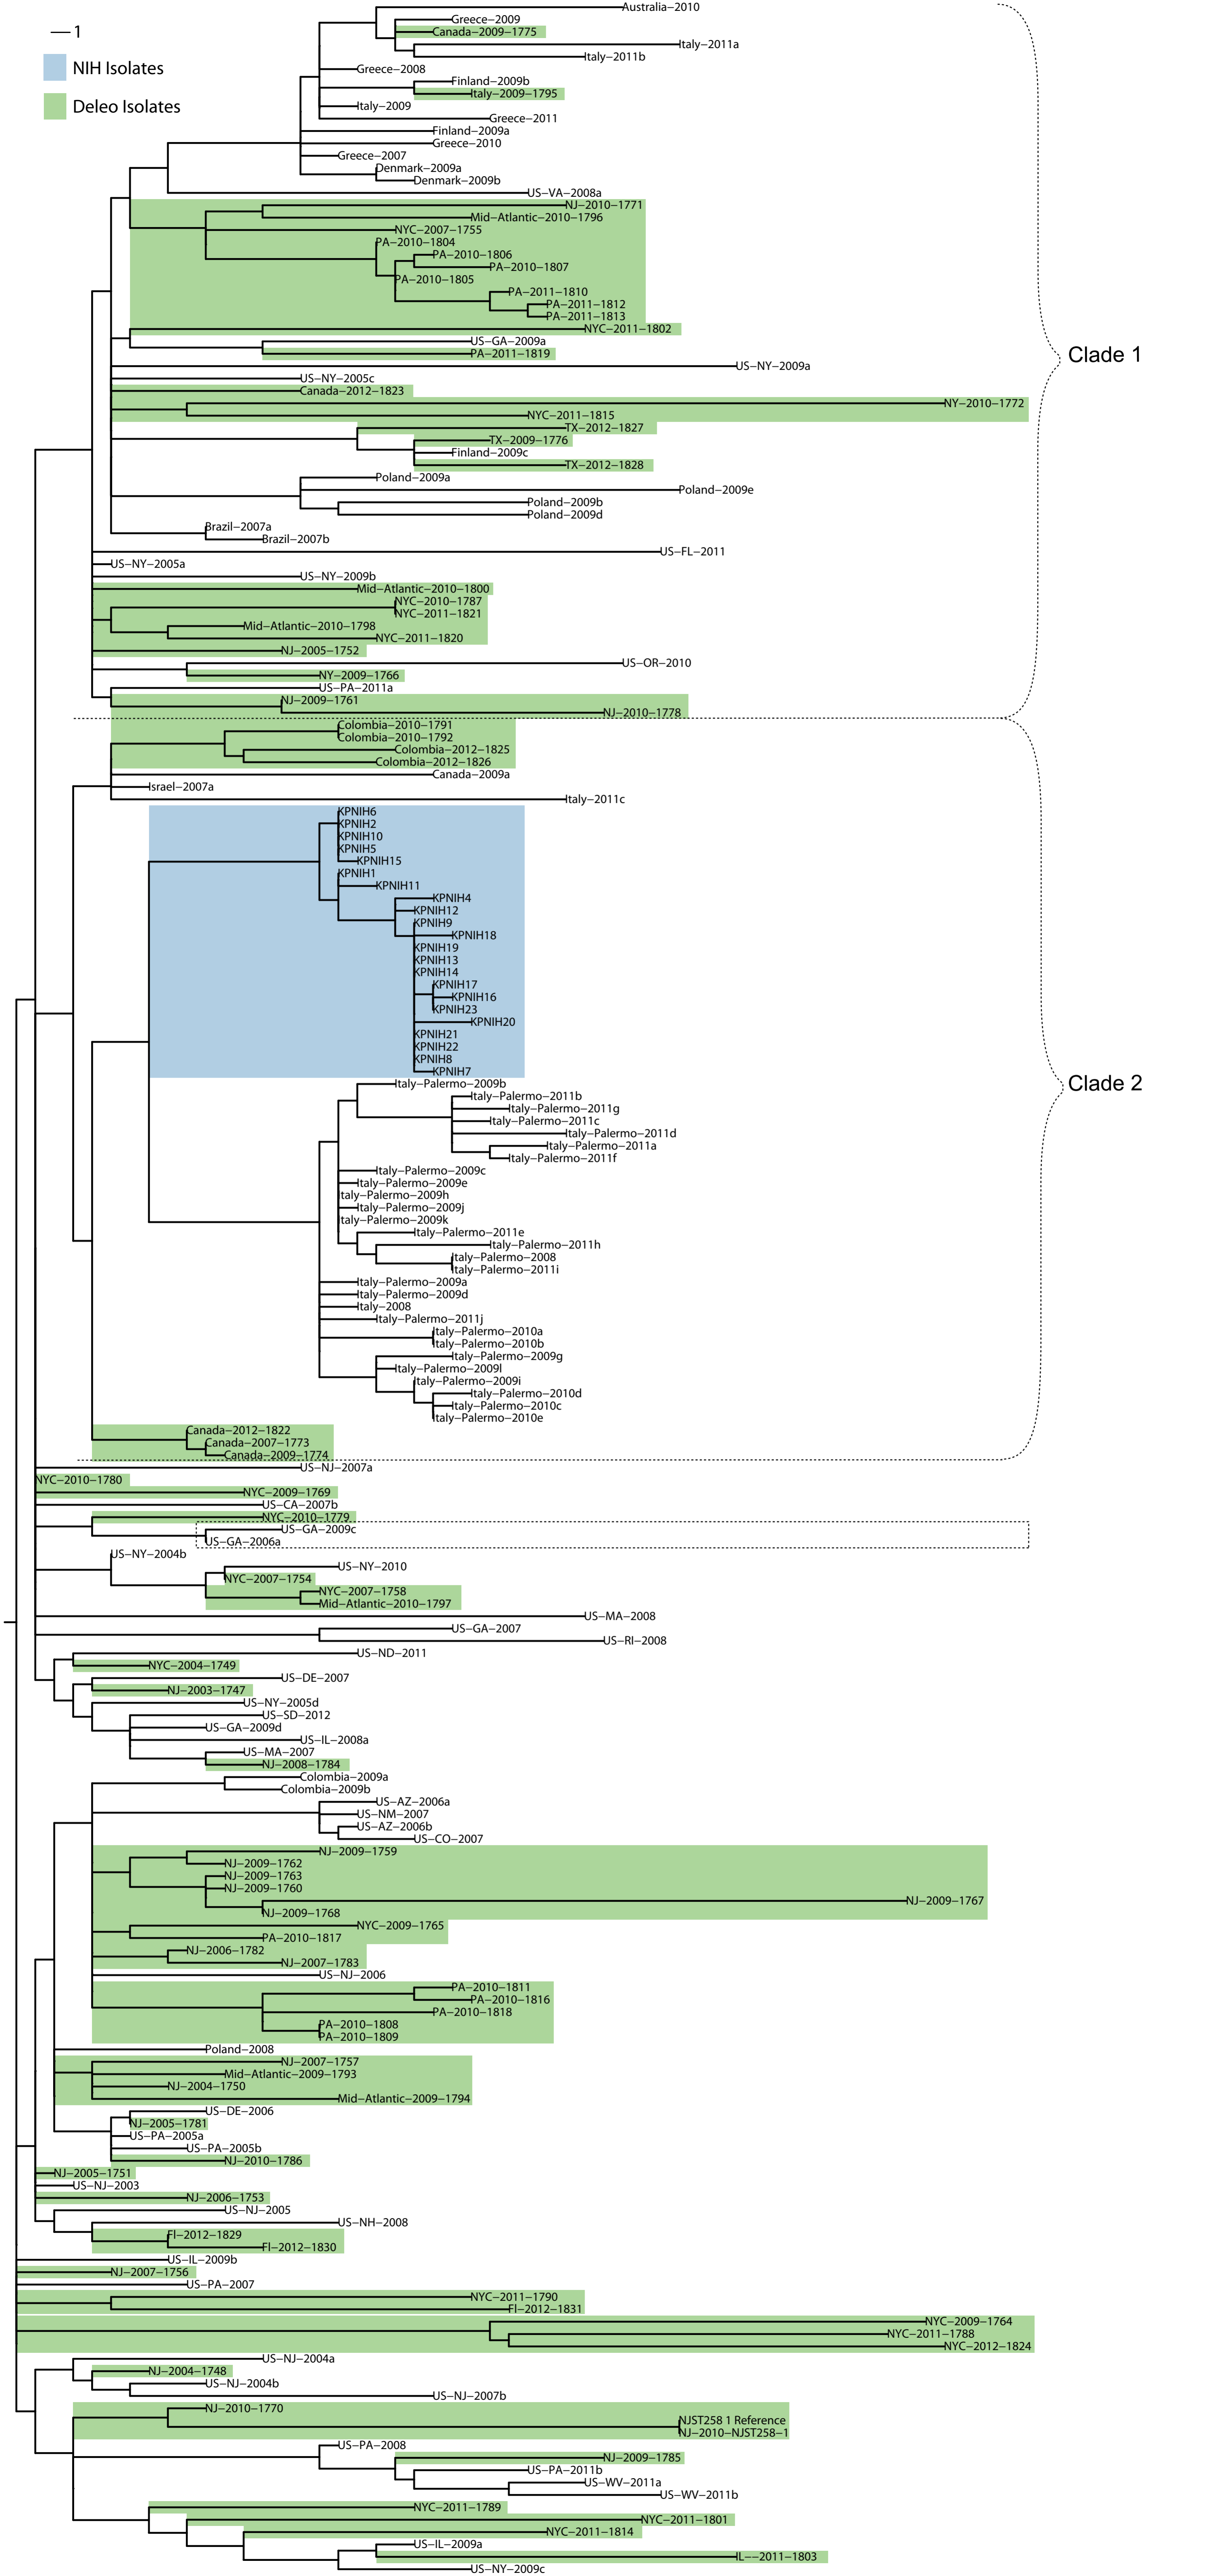

Supplement: pone.0133727.s001.pdf [file pone.0133727.s001.pdf]
